# Supplementary material for: Nuclear exchange generates population diversity in the wheat leaf rust pathogen Puccinia triticina
Source: PubMed Central journal article supplement (PMC10627818; doi:10.1038/s41564-023-01494-9), 2023-10-26
Supplement: 41564_2023_1494_MOESM1_ESM.pdf [file 41564_2023_1494_MOESM1_ESM.pdf]

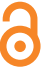

# **Nuclear exchange generates population diversity in the wheat leaf rust pathogen *Puccinia triticina***

---

In the format provided by the authors and unedited

**Supplementary Table S1: The *Pt* isolates collected in this study with sample locations in Australia and pathotypes.** The nuclear genotypes derived from *k*-mer and lineage assignments according to phylogenetic tree analysis are shown. The nuclear genotype of 20QLD87 later derived as CD is also shown. (ACT: Australian Capital Territory; QLD: Queensland; NSW: New South Wales).

| Isolate name                          | Sample collection | Collection year | Pathotype               | Nuclear genotype | Lineage |
|---------------------------------------|-------------------|-----------------|-------------------------|------------------|---------|
| 19ACT06 ( <i>Pt76</i> ) <sup>24</sup> | Canberra, ACT     | 2019            | 76-3,5,7,9,10,12,13     | AB               | AU1     |
| 19QLD08                               | Gatton, QLD       | 2019            | 76-1,3,5,7,9,10,12,13   | AB               |         |
| 19NSW04                               | Wagga Wagga, NSW  | 2019            | 104-1,3,4,5,6,7,9,10,12 | BC               | AU2     |
| 19ACT07                               | Canberra, ACT     | 2019            |                         | BC               |         |
| 20QLD91                               | Gatton, QLD       | 2020            |                         | BC               |         |
| 20ACT90                               | Canberra, ACT     | 2020            |                         | BC               |         |
| 20QLD87                               | Warwick, QLD      | 2020            | 104-1,3,4,6,7,8,9,10,12 | CD               | AU3     |

**Supplementary Table S2: Statistics for the hifiasm-haplotype 1 and hifiasm-haplotype 2 assemblies before scaffolding.**

| Statistic               | 19NSW04 hifiasm-haplotype 1 | 19NSW04 hifiasm-haplotype 2 | 20QLD87 hifiasm-haplotype 1 | 20QLD87 hifiasm-haplotype 2 |
|-------------------------|-----------------------------|-----------------------------|-----------------------------|-----------------------------|
| Assembly size           | 129.487 Mb                  | 123.558 Mb                  | 123.181 Mb                  | 125.281 Mb                  |
| # of contigs            | 119                         | 61                          | 81                          | 64                          |
| N/L50                   | 8/6.813 Mb                  | 9/6.623 Mb                  | 9/5.992 Mb                  | 9/5.943 Mb                  |
| Maximum scaffold length | 9.616 Mb                    | 8.623 Mb                    | 8.313 Mb                    | 8.988 Mb                    |
| GC content              | 46.54%                      | 46.57%                      | 46.59%                      | 46.62%                      |
| Complete BUSCOs (%)     | 96.3%                       | 95.2%                       | 95.7%                       | 96.3%                       |
| Duplicated BUSCOs (%)   | 5.4%                        | 3.9%                        | 3.6%                        | 4.2%                        |
| Fragmented BUSCOs (%)   | 2.7%                        | 2.6%                        | 3%                          | 2.7%                        |
| Haplotype identity      | C                           | B                           | D                           | C                           |

**Supplementary Table S3: Assembly statistics for the two haplotypes of the scaffolded hifiasm assemblies with Hi-C integration.**

| Statistic                                   | 19NSW04 haplotype C chromosomes | 19NSW04 haplotype B chromosomes | 19NSW04 unplaced contigs | 20QLD87 haplotype D chromosomes | 20QLD87 haplotype C chromosomes | 20QLD87 unplaced contigs |
|---------------------------------------------|---------------------------------|---------------------------------|--------------------------|---------------------------------|---------------------------------|--------------------------|
| Assembly size                               | 123.8 Mb                        | 122.1 Mb                        | 7.2 Mb                   | 121.8 Mb                        | 123.3 Mb                        | 3.0 Mb                   |
| Number of scaffolds/contigs                 | 18                              | 18                              | 123                      | 18                              | 18                              | 79                       |
| N/L50                                       | -                               | -                               | 27/76.2 Kb               | -                               | -                               | 21/38.7 Kb               |
| Maximum scaffold length                     | 9.6 Mb                          | 9.2 Mb                          | 326.9 Kb                 | 9.3 Mb                          | 9.4 Mb                          | 164.3 Kb                 |
| GC content                                  | 46.6%                           | 46.7%                           | 43.6%                    | 46.6%                           | 46.6%                           | 44.1%                    |
| Complete BUSCOs (%)                         | 96.1%                           | 96.2%                           | 0.8%                     | 96%                             | 96.1%                           | 0.2%                     |
| Duplicated BUSCOs (%)                       | 3.7%                            | 3.5%                            | 0.1%                     | 3.4%                            | 3.6%                            | 0.1%                     |
| Fragmented BUSCOs (%)                       | 2.8%                            | 2.7%                            | 0.1%                     | 2.8%                            | 2.8%                            | 0%                       |
| Number of genes                             | 17,939                          | 18,138                          | 245                      | 18,952                          | 18,804                          | 90                       |
| % repetitive sequence                       | 63.9%                           | 63.5%                           | 92.7%                    | 62.6%                           | 63.1%                           | 90%                      |
| % retroelements                             | 31.4%                           | 30.9%                           | 15.8%                    | 31.1%                           | 31.9%                           | 19.7%                    |
| % DNA transposons                           | 6.3%                            | 6.4%                            | 1.4%                     | 6.4%                            | 6.5%                            | 3.3%                     |
| % unclassified repeats                      | 23.6%                           | 24%                             | 19.5%                    | 23.6%                           | 23.2%                           | 24%                      |
| % ribosomal RNAs                            | 0.9%                            | 0.7%                            | 51.6%                    | 0.6%                            | 0.6%                            | 40.3%                    |
| Assembly consensus quality value (QV score) |                                 | 55.6                            | -                        |                                 | 59.7                            | -                        |

**Supplementary Table S4: Statistics for genomic alignments between the *Pt76* and the 19NSW04/20QLD87 haplotype chromosomes.**

| <i>Within-isolate alignments</i>      | <b>19NSW04 haplotype B versus haplotype C</b> | <b>20QLD87 haplotype C versus haplotype D</b> | <b><i>Pt76</i> haplotype A versus haplotype B</b> |
|---------------------------------------|-----------------------------------------------|-----------------------------------------------|---------------------------------------------------|
| Aligned bases                         | 97.9%                                         | 97.4%                                         | 97.1%                                             |
| Average identity of 1-to-1 alignments | 99.5%                                         | 99.5%                                         | 99.5%                                             |
| Average identity of M-to-M alignments | 99.1%                                         | 99.1%                                         | 99%                                               |
| Translocations                        | 849                                           | 848                                           | 1,053                                             |
| Inversions                            | 155                                           | 132                                           | 164                                               |
| Insertions                            | 8,913                                         | 8,617                                         | 10,898                                            |
| Total SNPs                            | 328,470                                       | 301,814                                       | 334,189                                           |
| Total Indels                          | 182,991                                       | 167,011                                       | 186,643                                           |

| <i>Between-isolate alignments</i>     | <b><i>Pt76</i> haplotype B versus 19NSW04 haplotype 1</b> | <b><i>Pt76</i> haplotype B versus 19NSW04 haplotype 2</b> | <b>20QLD87 haplotype 2 versus 19NSW04 haplotype 2</b> | <b>20QLD87 haplotype 2 versus 19NSW04 haplotype 1</b> | <b>20QLD87 haplotype 1 versus <i>Pt76</i> haplotype A</b> |
|---------------------------------------|-----------------------------------------------------------|-----------------------------------------------------------|-------------------------------------------------------|-------------------------------------------------------|-----------------------------------------------------------|
| Aligned bases                         | 99.03%                                                    | <b>99.97%</b>                                             | 98.88%                                                | <b>99.98%</b>                                         | 98.76%                                                    |
| Average identity of 1-to-1 alignments | 99.49%                                                    | <b>99.98%</b>                                             | 99.49%                                                | <b>99.99%</b>                                         | 99.49%                                                    |
| Average identity of M-to-M alignments | 99.06%                                                    | <b>99.95%</b>                                             | 99.07%                                                | <b>99.97%</b>                                         | 99.07%                                                    |
| Translocations                        | 900                                                       | <b>1</b>                                                  | 862                                                   | <b>4</b>                                              | 986                                                       |
| Inversions                            | 157                                                       | <b>6</b>                                                  | 145                                                   | <b>2</b>                                              | 146                                                       |
| Insertions                            | 10,601                                                    | <b>347</b>                                                | 11,233                                                | <b>260</b>                                            | 11,544                                                    |
| Total SNPs                            | 325,608                                                   | <b>2,966</b>                                              | 328,689                                               | <b>2,182</b>                                          | 327,782                                                   |
| Total Indels                          | 181,972                                                   | <b>9,457</b>                                              | 182,772                                               | <b>6,486</b>                                          | 180,947                                                   |
| <b>Assignment</b>                     |                                                           | 19NSW04 haplotype 2 = B                                   |                                                       | 19NSW04 haplotype 1 = C<br>20QLD87 haplotype 2 = C    |                                                           |

**Supplementary Table S5: SNPs derived from genomic alignments and their properties.**

| Comparison            | Number of SNPs | SNPs in repetitive regions | SNPs in coding regions | Non-synonymous SNPs | Nonsense SNPs | Number of proteins with variant | Number of secreted proteins with variant |
|-----------------------|----------------|----------------------------|------------------------|---------------------|---------------|---------------------------------|------------------------------------------|
| 19ACT06 B - 19NSW04 B | 2,966          | 2,367 (80.1%)              | 283 (9.5%)             | 163 (57.6%)         | 7 (2.5%)      | 60                              | 5 (8.3%)                                 |
| 19NSW04 C – 20QLD87 C | 2,182          | 1,773 (81.3%)              | 178 (8.2%)             | 100 (56.2%)         | 3 (1.7%)      | 122                             | 21 (17.2%)                               |
| 19ACT06 A - 19ACT06 B | 334,203        | 262,845 (78.7%)            | 35,110 (10.5%)         | 21,232 (60.5%)      | 526 (1.5%)    | 7,630                           | 1,215 (15.9%)                            |
| 19NSW04 B - 19NSW04 C | 328,470        | 256,429 (78.1%)            | 34,941 (10.6%)         | 21,340 (61.1%)      | 474 (1.4%)    | 7,858                           | 1,223 (15.6%)                            |
| 20QLD87 C - 20QLD87 D | 301,814        | 258,447 (85.6%)            | 32,754 (10.9%)         | 20,114 (61.4%)      | 529 (1.6%)    | 7,384                           | 1,108 (15%)                              |

**Supplementary Table S6: SNPs derived from genomic alignments and their location on the chromosomes.**

| <b>B haplotype variants</b> |                    |                 |                      | <b>C haplotype variants</b> |                    |                 |                      |
|-----------------------------|--------------------|-----------------|----------------------|-----------------------------|--------------------|-----------------|----------------------|
| <b>Chromosome (19NSW04)</b> | <b>Length</b>      | <b>Variants</b> | <b>Variants rate</b> | <b>Chromosome (19NSW04)</b> | <b>Length</b>      | <b>Variants</b> | <b>Variants rate</b> |
| 1 B                         | 9,204,362          | 158             | 58,255               | 1 C                         | 9,316,129          | 94              | 99,107               |
| 2 B                         | 7,951,971          | 112             | 70,999               | 2 C                         | 7,154,143          | 26              | 275,159              |
| 3 B                         | 8,920,942          | 82              | 108,791              | 3 C                         | 9,016,186          | 39              | 231,184              |
| 4 B                         | 8,537,679          | 259             | 32,964               | 4 C                         | 8,922,052          | 100             | 89,220               |
| 5 B                         | 8,007,851          | 259             | 30,918               | 5 C                         | 7,944,558          | 162             | 49,040               |
| 6 B                         | 8,182,878          | 98              | 83,498               | 6 C                         | 9,615,590          | 66              | 145,690              |
| 7 B                         | 7,671,061          | 360             | 21,308               | 7 C                         | 7,664,942          | 60              | 127,749              |
| 8 B                         | 7,350,761          | 108             | 68,062               | 8 C                         | 7,484,054          | 37              | 202,271              |
| 9 B                         | 6,788,249          | 93              | 72,991               | 9 C                         | 7,031,919          | 26              | 270,458              |
| 10 B                        | 7,565,484          | 368             | 20,558               | 10 C                        | 7,216,867          | 35              | 206,196              |
| 11 B                        | 6,990,834          | 106             | 65,951               | 11 C                        | 6,813,017          | 281             | 24,245               |
| 12 B                        | 5,939,218          | 118             | 50,332               | 12 C                        | 6,034,179          | 227             | 26,582               |
| 13 B                        | 5,575,677          | 231             | 24,137               | 13 C                        | 5,707,219          | 23              | 248,139              |
| 14 B                        | 5,329,819          | 49              | 108,771              | 14 C                        | 5,388,068          | 47              | 114,639              |
| 15 B                        | 4,442,786          | 63              | 70,520               | 15 C                        | 4,475,553          | 23              | 194,589              |
| 16 B                        | 4,691,570          | 253             | 18,543               | 16 C                        | 4,941,809          | 39              | 126,713              |
| 17 B                        | 4,550,902          | 197             | 23,101               | 17 C                        | 4,705,371          | 64              | 73,521               |
| 18 B                        | 4,374,653          | 52              | 84,127               | 18 C                        | 4,313,118          | 833             | 5,177                |
| <b>Total</b>                | <b>122,076,697</b> | <b>2,966</b>    | <b>41,158</b>        | <b>Total</b>                | <b>123,744,774</b> | <b>2,182</b>    | <b>56,711</b>        |

| <b>AB haplotype variants</b> |                    |                 |                      | <b>BC haplotype variants</b> |                    |                 |                      |
|------------------------------|--------------------|-----------------|----------------------|------------------------------|--------------------|-----------------|----------------------|
| <b>Chromosome (19ACT06)</b>  | <b>Length</b>      | <b>Variants</b> | <b>Variants rate</b> | <b>Chromosome (19NSW04)</b>  | <b>Length</b>      | <b>Variants</b> | <b>Variants rate</b> |
| 1 A                          | 9,506,148          | 22,218          | 427                  | 1 B                          | 9,204,362          | 21,390          | 430                  |
| 2 A                          | 8,009,403          | 25,043          | 319                  | 2 B                          | 7,951,971          | 20,565          | 386                  |
| 3 A                          | 8,950,327          | 26,605          | 336                  | 3 B                          | 8,920,942          | 18,222          | 489                  |
| 4 A                          | 8,524,094          | 23,715          | 359                  | 4 B                          | 8,537,679          | 18,305          | 466                  |
| 5 A                          | 7,886,703          | 19,132          | 412                  | 5 B                          | 8,007,851          | 23,759          | 337                  |
| 6 A                          | 8,486,047          | 25,704          | 330                  | 6 B                          | 8,182,878          | 26,824          | 305                  |
| 7 A                          | 7,806,228          | 20,495          | 380                  | 7 B                          | 7,671,061          | 20,663          | 371                  |
| 8 A                          | 7,740,161          | 21,943          | 352                  | 8 B                          | 7,350,761          | 19,548          | 376                  |
| 9 A                          | 7,101,616          | 15,953          | 445                  | 9 B                          | 6,788,249          | 25,401          | 267                  |
| 10 A                         | 7,138,558          | 14,572          | 489                  | 10 B                         | 7,565,484          | 21,790          | 347                  |
| 11 A                         | 6,975,844          | 26,053          | 267                  | 11 B                         | 6,990,834          | 16,327          | 428                  |
| 12 A                         | 6,725,789          | 21,776          | 308                  | 12 B                         | 5,939,218          | 17,463          | 340                  |
| 13 A                         | 5,634,657          | 11,674          | 482                  | 13 B                         | 5,575,677          | 13,970          | 399                  |
| 14 A                         | 5,301,928          | 18,206          | 291                  | 14 B                         | 5,329,819          | 16,551          | 322                  |
| 15 A                         | 4,388,549          | 14,747          | 297                  | 15 B                         | 4,442,786          | 14,851          | 299                  |
| 16 A                         | 4,755,494          | 6,525           | 728                  | 16 B                         | 4,691,570          | 11,575          | 405                  |
| 17 A                         | 4,616,298          | 12,755          | 361                  | 17 B                         | 4,550,902          | 11,591          | 392                  |
| 18 A                         | 4,363,601          | 7,087           | 615                  | 18 B                         | 4,374,653          | 9,675           | 452                  |
| <b>Total</b>                 | <b>123,911,445</b> | <b>334,203</b>  | <b>370</b>           | <b>Total</b>                 | <b>122,076,697</b> | <b>328,470</b>  | <b>371</b>           |

| <b>CD haplotype variants</b> |                    |                 |                      |
|------------------------------|--------------------|-----------------|----------------------|
| <b>Chromosome (20QLD87)</b>  | <b>Length</b>      | <b>Variants</b> | <b>Variants rate</b> |
| 1 C                          | 9,365,963          | 20,704          | 452                  |
| 2 C                          | 8,279,169          | 22,640          | 365                  |
| 3 C                          | 9,012,612          | 19,929          | 452                  |
| 4 C                          | 8,396,214          | 17,729          | 473                  |
| 5 C                          | 7,810,846          | 19,972          | 391                  |
| 6 C                          | 8,497,072          | 24,128          | 352                  |
| 7 C                          | 7,710,878          | 19,509          | 395                  |
| 8 C                          | 7,461,278          | 18,667          | 399                  |
| 9 C                          | 7,516,638          | 22,994          | 326                  |
| 10 C                         | 7,216,724          | 15,645          | 461                  |
| 11 C                         | 6,814,370          | 16,044          | 424                  |
| 12 C                         | 6,055,093          | 16,388          | 369                  |
| 13 C                         | 5,706,749          | 11,320          | 504                  |
| 14 C                         | 5,288,343          | 11,851          | 446                  |
| 15 C                         | 4,480,348          | 14,154          | 316                  |
| 16 C                         | 4,910,384          | 12,804          | 383                  |
| 17 C                         | 4,412,544          | 7,582           | 581                  |
| 18 C                         | 4,316,561          | 9,754           | 442                  |
| <b>Total</b>                 | <b>123,251,786</b> | <b>301,814</b>  | <b>408</b>           |

**Supplementary Table S7:** Illumina read coverage, number of homozygous SNPs and *k*-mer containment score for the genomic loci of the b2, b3, b4 and b5 genes.

|                | <i>Pt76</i> b2 (haplotype A) |            |             | <i>Pt76</i> b3 (haplotype B) |            |             | 20QLD87 b4 (haplotype C) |            |             | 20QLD87 b5 (haplotype D) |            |             | genotype |
|----------------|------------------------------|------------|-------------|------------------------------|------------|-------------|--------------------------|------------|-------------|--------------------------|------------|-------------|----------|
|                | Coverage                     | # hom SNPs | k-mer score | Coverage                     | # hom SNPs | k-mer score | Coverage                 | # hom SNPs | k-mer score | Coverage                 | # hom SNPs | k-mer score |          |
| AU1 (AB)       | 100%                         | 0          | 100%        | 100%                         | 0          | 100%        | 70.8%                    | 9          | 98.3%       | 83.4%                    | 24         | 98.8%       | b2/b3    |
| AU2 (BC)       | 62.5%                        | 26         | 97.9%       | 100%                         | 0          | 100%        | 100%                     | 0          | 100%        | 82.3%                    | 34         | 98.8%       | b3/b4    |
| 20QLD87 (CD)   | 62.4%                        | 8          | 97.9%       | 79.6%                        | 16         | 98.3%       | 100%                     | 0          | 100%        | 100%                     | 0          | 100%        | b4/b5    |
| AU5 (A)        | 100%                         | 0          | 100%        | 67.5%                        | 31         | 98.1%       | 66.8%                    | 16         | 98.4%       | 75.3%                    | 21         | 99.1%       | b2/?     |
| AU4            | 60.7%                        | 8          | 98.2%       | 72%                          | 15         | 98.5%       | 60.2%                    | 16         | 98.5%       | 100%                     | 0          | 100%        | b5/?     |
| 09TUR23-1 (AB) | 100%                         | 0          | 100%        | 100%                         | 0          | 100%        | 63%                      | 6          | 99%         | 99.8%                    | 8          | 99.8%       | b2/b3    |
| CZ10-9 (A)     | 100%                         | 0          | 100%        | 74.9%                        | 21         | 98.8%       | 64.8%                    | 8          | 99%         | 94.8%                    | 15         | 99.6%       | b2/?     |
| FR56 (A)       | 100%                         | 0          | 100%        | 87.4%                        | 19         | 99.2%       | 69.6%                    | 12         | 98.9%       | 76.6%                    | 15         | 99.3%       | b2/?     |
| EU1            | 74.6%                        | 10         | 97.9%       | 74.3%                        | 15         | 97.9%       | 56.7%                    | 11         | 98.3%       | 96.4%                    | 7          | 99.2%       | ??       |
| EU4            | 100%                         | 0          | 100%        | 100%                         | 0          | 100%        | 62.9%                    | 9          | 98.3%       | 75.5%                    | 22         | 98.8%       | b2/b3    |
| EU5            | 91.8%                        | 5          | 99.5%       | 74.7%                        | 21         | 98.7%       | 76.2%                    | 9          | 99.1%       | 94.6%                    | 13         | 99.6%       | ??       |
| NA1            | 98.2%                        | 9          | 99.2%       | 71.1%                        | 22         | 97.7%       | 64.9%                    | 8          | 98.2%       | 75%                      | 23         | 98.3%       | ??       |
| NA2            | 89.2%                        | 8          | 99.1%       | 72.2%                        | 22         | 98%         | 67.8%                    | 11         | 98.5%       | 81.3%                    | 17         | 98.8%       | ??       |
| NA3 (CD)       | 63.8%                        | 8          | 98.1%       | 69.4%                        | 16         | 98.3%       | 99.9%                    | 0          | 100%        | 99.9%                    | 0          | 100%        | b4/b5    |
| NA4 (D)        | 66.6%                        | 7          | 98.7%       | 66.7%                        | 18         | 98%         | 51.1%                    | 6          | 98.6%       | 100%                     | 0          | 100%        | b5/?     |
| NA5 (D)        | 70.6%                        | 9          | 98.5%       | 74.1%                        | 18         | 98.7%       | 69.5%                    | 14         | 99%         | 100%                     | 0          | 100%        | b5/?     |
| NA6 (D)        | 65.9%                        | 11         | 98.2%       | 74.3%                        | 20         | 98.6%       | 61.3%                    | 19         | 98.7%       | 100%                     | 0          | 100%        | b5/?     |
| NA7 (C)        | 72.2%                        | 8          | 99%         | 64.6%                        | 14         | 98.3%       | 99.9%                    | 0          | 99.9%       | 79.9%                    | 8          | 99.2%       | b4/?     |
| Durum          | 76.7%                        | 14         | 98.2%       | 70.6%                        | 16         | 98%         | 73.3%                    | 10         | 98.4%       | 75.4%                    | 20         | 98.5%       | ??       |
| Middle East    | 100%                         | 0          | 100%        | 64.1%                        | 20         | 98.3%       | 100%                     | 0          | 100%        | 61.4%                    | 17         | 98.8%       | b2/b4    |

**Supplementary Table S8:** Pathotyping results for the set of seven Australian isolates.

|                      | Differential number | Resistance gene  | Cultivar    | 19NSW04 | 19ACT06 | 19ACT07 | 19QLD08 | 20QLD87 | 20ACT90 | 20QLD91 |
|----------------------|---------------------|------------------|-------------|---------|---------|---------|---------|---------|---------|---------|
|                      |                     |                  |             |         |         |         |         |         |         |         |
| International series |                     | <i>Lr1</i>       | Tarsa       | V       | A       | V       | A       | V       | V       | V       |
|                      |                     | <i>Lr2a</i>      | Webster     | A       | A       | A       | A       | A       | A       | A       |
|                      |                     | <i>Lr3a</i>      | Democrat    | V       | V       | V       | V       | V       | V       | V       |
| Australian series    | 1                   | <i>Lr20</i>      | Thew        | V       | A       | V       | V       | V       | V       | V       |
|                      | 2                   | <i>Lr23</i>      | Gaza        | A       | A       | A       | A       | A       | A       | A       |
|                      | 3                   | <i>Lr14a</i>     | Spica       | V       | V       | V       | V       | V       | V       | V       |
|                      | 4                   | <i>Lr15</i>      | K1483       | V       | A       | V       | A       | V       | V       | V       |
|                      | 5                   | <i>Lr3ka</i>     | Klein Titan | V       | V       | V       | V       | A       | V       | V       |
|                      | 6                   | <i>Lr27+Lr31</i> | Gatcher     | V       | V       | V       | A       | V       | A       | V       |
|                      | 7                   | <i>Lr17a</i>     | Songlen     | V       | V       | V       | V       | V       | V       | V       |
|                      | 8                   | <i>Lr28</i>      | CS 2A/2M    | A       | A       | A       | A       | V       | A       | A       |
|                      | 9                   | <i>Lr26</i>      | Mildress    | V       | V       | V       | V       | V       | V       | V       |
|                      | 10                  | <i>Lr13</i>      | Egret       | V       | V       | V       | V       | V       | V       | V       |
|                      | 11                  | <i>Lr16</i>      | Exchange    | A       | A       | A       | A       | A       | A       | A       |
|                      | 12                  | <i>Lr17b</i>     | Harrier     | V       | V       | V       | V       | V       | V       | V       |
|                      | 13                  | <i>Lr24</i>      | Agent       | A       | V       | A       | V       | A       | A       | A       |

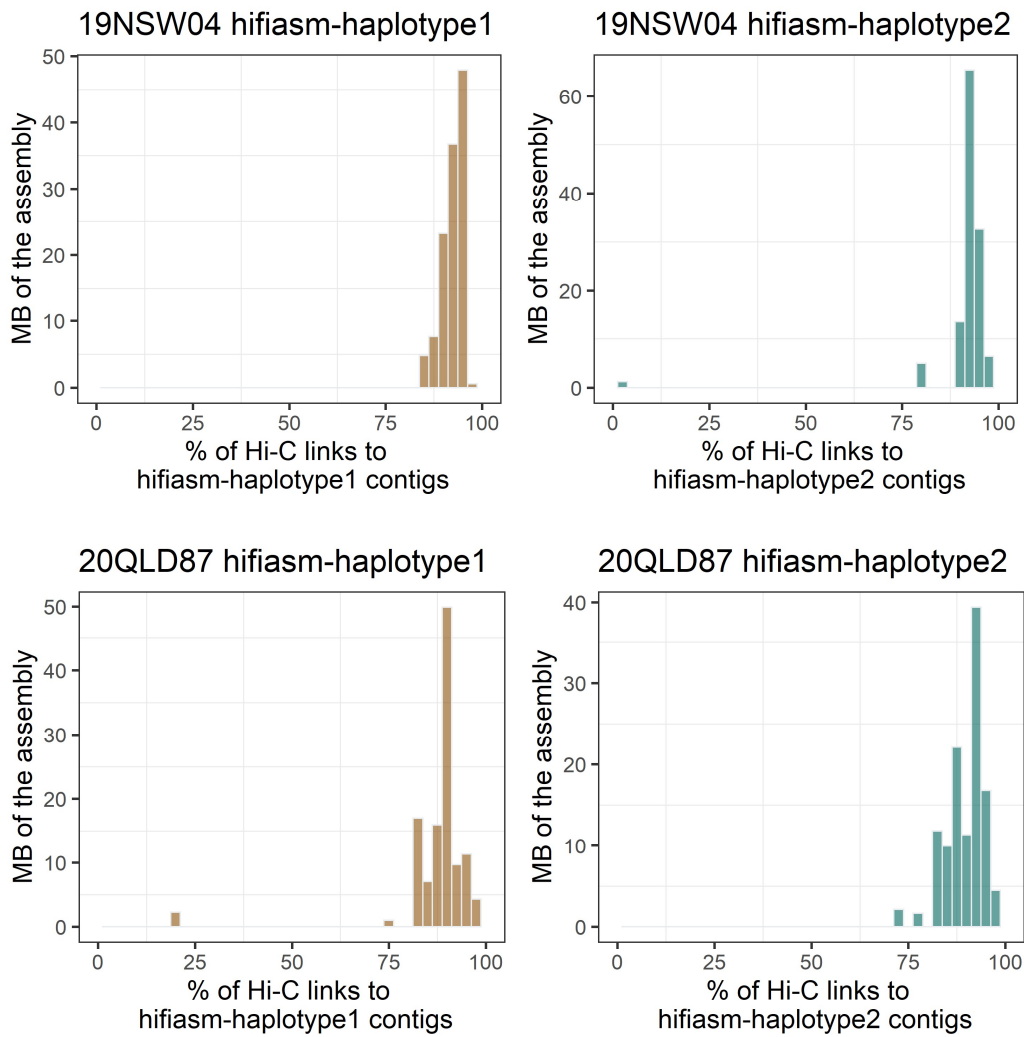

**Figure S1: Hi-C *trans* contacts between the hifiasm-haplotype1 and hifiasm-haplotype2 in the 19NSW04 and 20QLD87 assemblies.** Hi-C *trans* contacts for each contig were extracted from the HiC-Pro contact map in 100 Kb bins. The two assemblies exhibit a strong dikaryotic phasing signal. In both cases the haplotype1 and haplotype2 assemblies are close to perfectly nuclear-assigned, with only two contigs larger than 150 Kb (1.2 Mb in total) assigned to the incorrect phase in 19NSW04 and only a single mis-assigned contig (2.2 Mb) in 20QLD87.

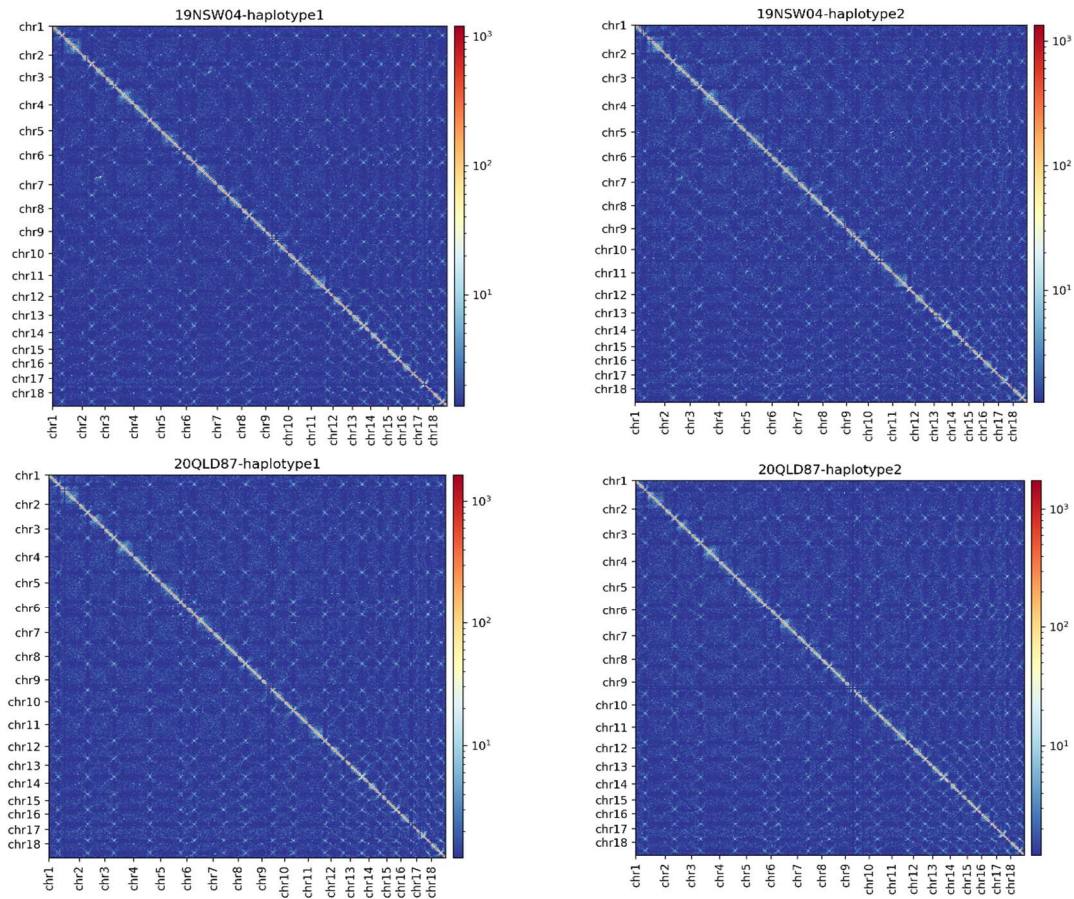

(A)

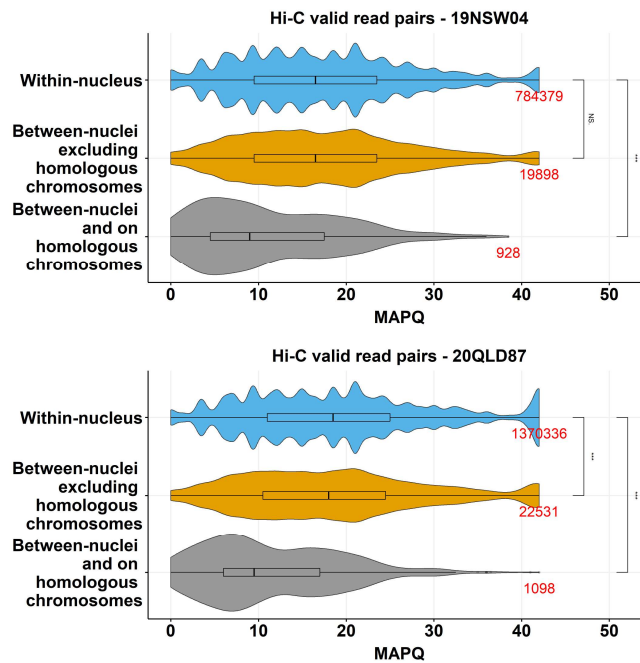

(B)

**Figure S2: (A) Hi-C contact maps (100 Kb resolution) for the haplotype chromosomes of the two isolates 19NSW04 and 20QLD87. The 18 centromeres are visible as distinct outwards-spreading bowtie-like shapes. (B) Mapping qualities (MAPQ) of Hi-C read pairs. Total number of Hi-C read pairs are shown in red. Mapping quality (MAPQ) reflects the degree of confidence in the point of origin for a read. For example, MAPQ of 10 or less indicates that there is at least a 1 in 10 chance that the read originated from another genomic location. Mis-mapped Hi-C reads occur primarily between allelic, homologous chromosomes and as expected, these have significantly lower mapping quality in both isolates. In contrast, read pairs that occur between the two nuclei but are not on homologous chromosomes do not have significantly lower mapping in both isolates. Such Hi-C read pairs could be a result of some non-intact nuclei during the crosslinking. In the box plot, the boundaries represent the 25th percentile and the 75th percentile, with a line highlighting the median. The upper whisker extends from the hinge to the largest value no further than 1.5 \***

interquartile range from the hinge. The lower whisker extends from the hinge to the smallest value at most  $1.5 \times$  interquartile range of the hinge. Outlier points are not shown in the box plot. \*\*\* indicates that the  $p$ -value from a  $t$ -test was  $< 0.001$ .

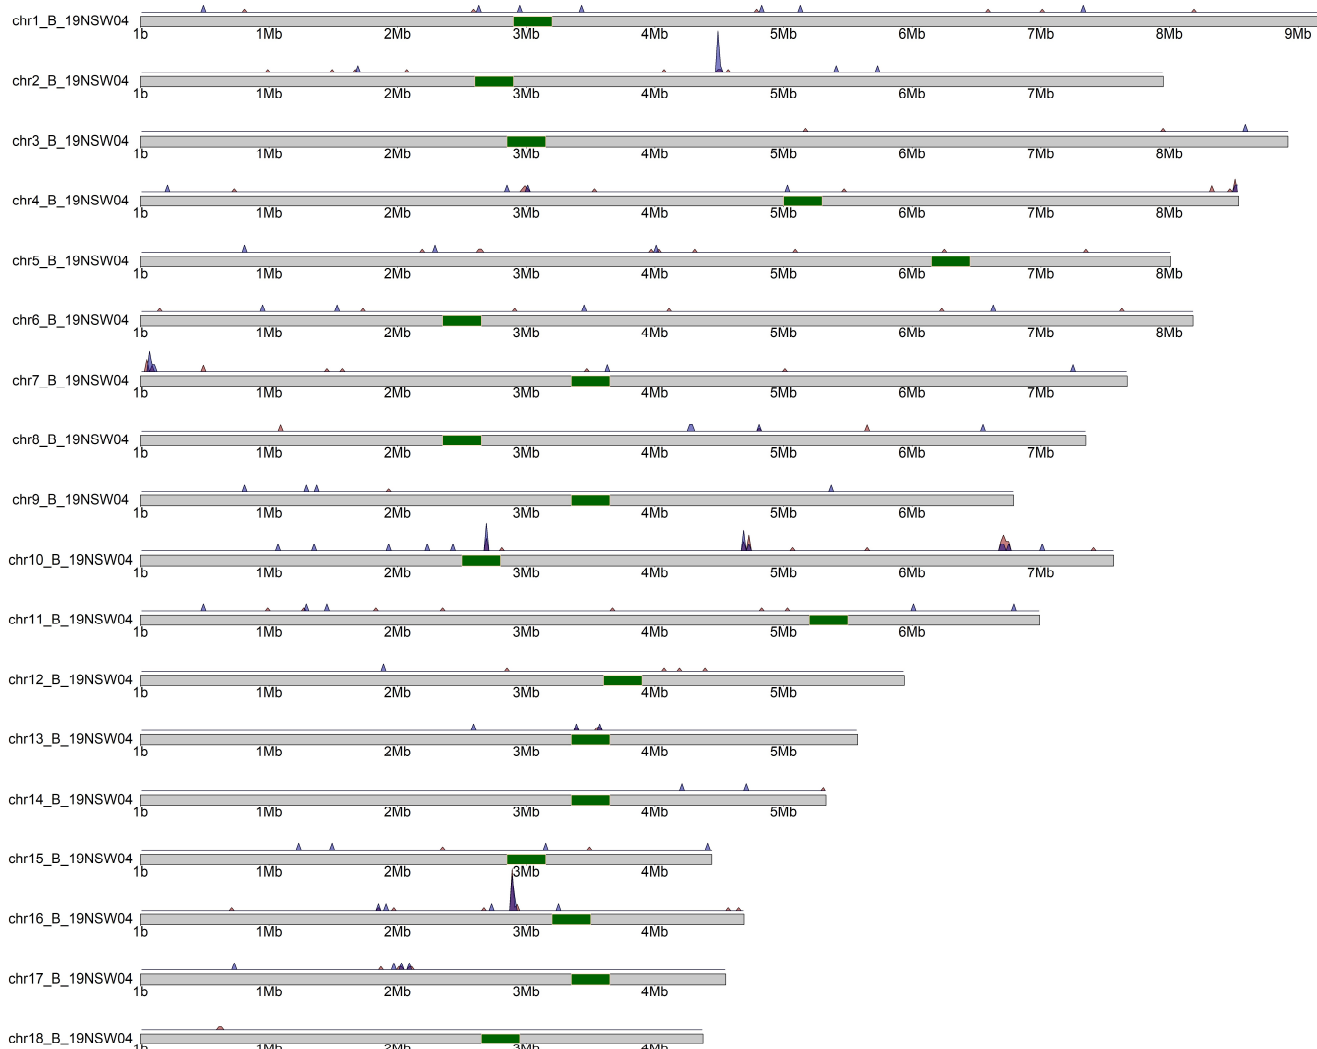

**Figure S3: SNP density of the B haplotype variants in 20 KB windows. Non-synonymous SNPs are shown in red, synonymous SNPs are shown in blue.**



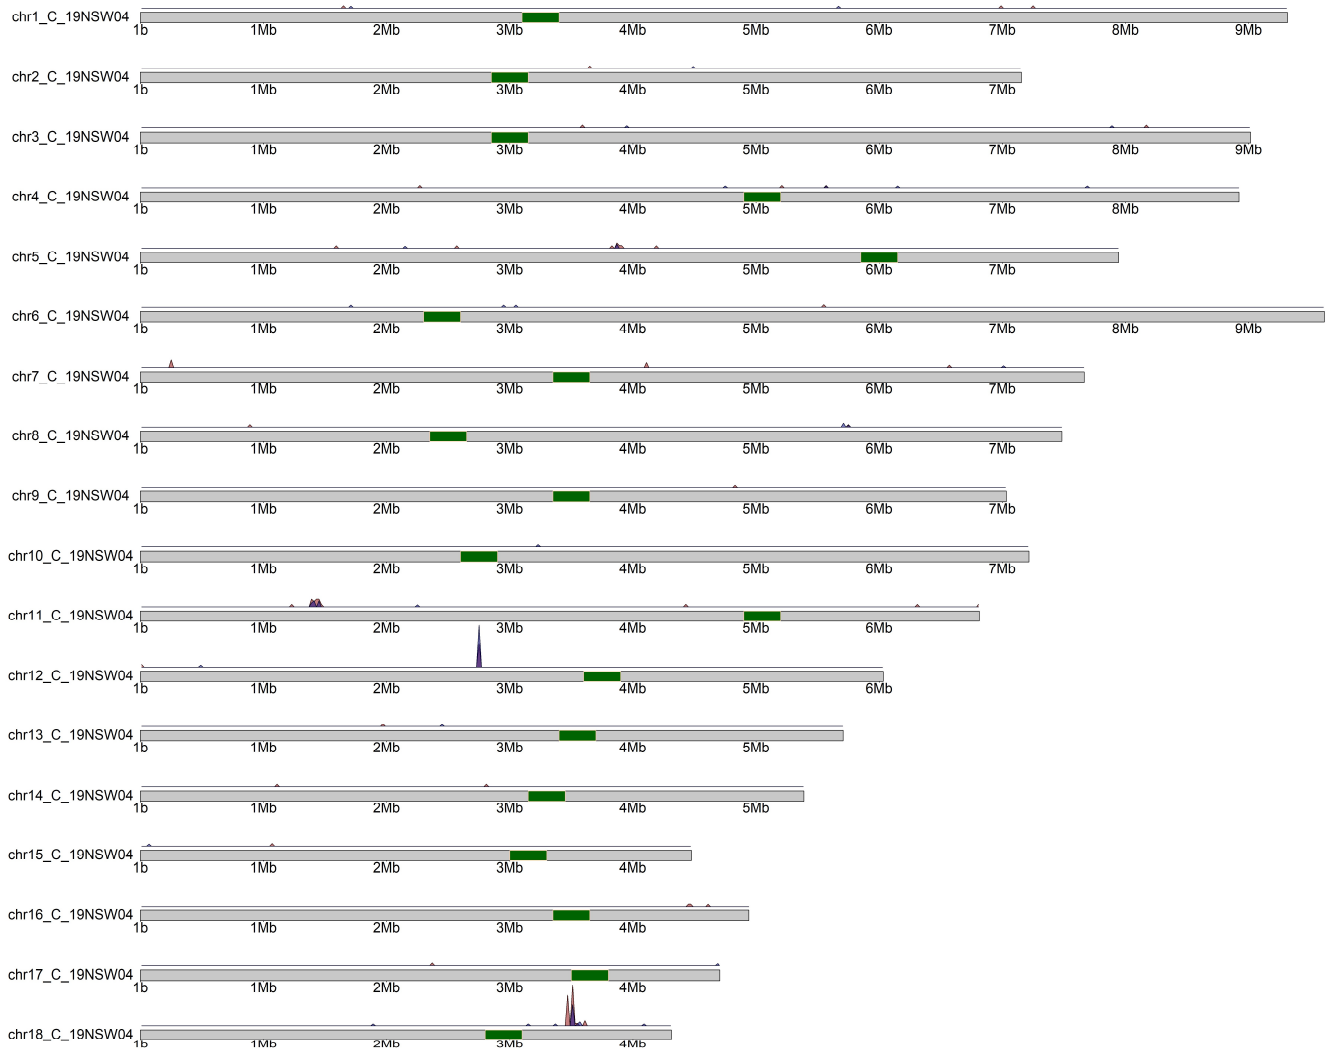

**Figure S4: SNP density of the C haplotype variants in 20 KB windows. Non-synonymous SNPs are shown in red, synonymous SNPs are shown in blue.**

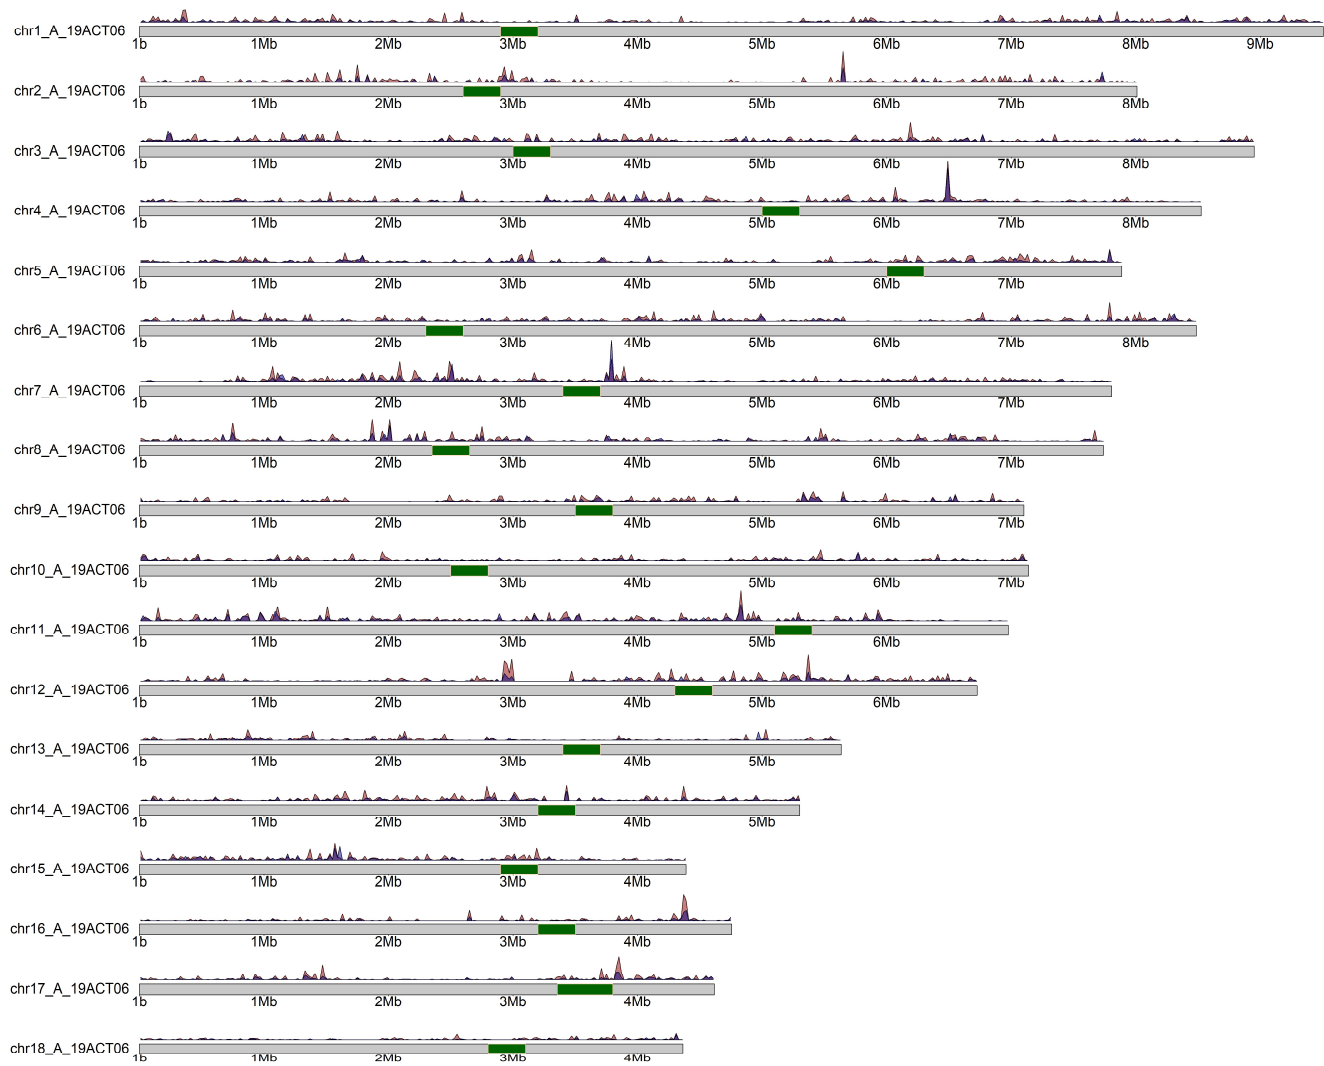

**Figure S5: SNP density of the AB haplotype variants in 20 KB windows. Non-synonymous SNPs are shown in red, synonymous SNPs are shown in blue.**

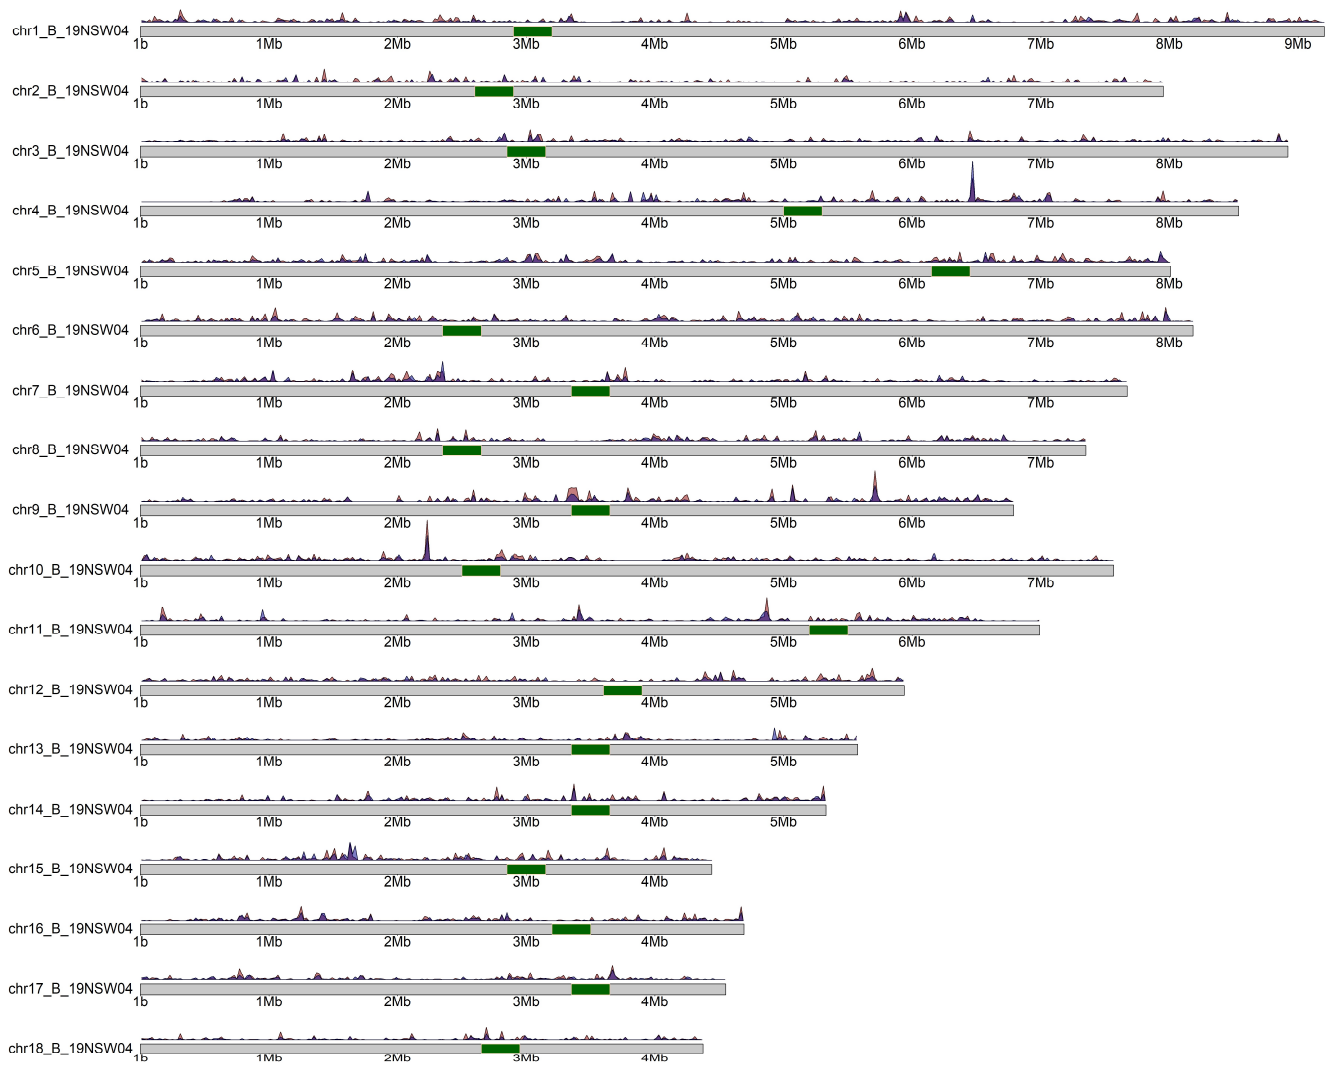

**Figure S6: SNP density of the BC haplotype variants in 20 KB windows. Non-synonymous SNPs are shown in red, synonymous SNPs are shown in blue.**



|                   |     |                                                                                                                          |     |
|-------------------|-----|--------------------------------------------------------------------------------------------------------------------------|-----|
| 19NSW04_bE3-chr4B | 1   | ..V...A.....SS.I..A.L.D.M.....V..Q...S.....V..ITP.N..F.....SC.LQ.....R...AF.....HR.....                                  | 127 |
| 19ACT06_bE3-chr4B | 1   | ..V...A.....SS.I..A.L.D.M.....V..Q...S.....V..ITP.N..F.....SC.LQ.....R...AF.....HR.....                                  | 127 |
| 20QLD87_bE3-chr4B | 1   | --MV...A.S.P...S.A.S.I..A.M.D.M.....R..E-V..E.....L.H.N...ITP.Q..A.T..A..L.M...I.NT.....R.T.T...R..L...W..L.VV...A...I.. | 126 |
| 20QLD87_bE4-chr4C | 1   | ..I..SR.....I..V...I..R...AT.S..LT...S...I.....Q...S...A.....M...E.....DT.....I...SQC..L..V...RM..                       | 128 |
| 19NSW04_bE4-chr4C | 1   | ..I..SR.....I..V...I..R...AT.S..LT...S...I.....Q...S...A.....M...E.....DT.....I...SQC..L..V...RM..                       | 128 |
| Race1_bE1         | 1   | ..I..N...TR..I..L...AA.L...T..F.D...N..N.L.H.I.L.Y.....R..Q...Q.H.VL.IHR..V..K...E.F..S.Q..Y..SEF.....R...T.H.I..        | 128 |
| Race1_bE2         | 1   | .....L.S...RAKT.V.R.....I.S.L..RQRPV-L.....I.A.A..V...Q...VL.DR...AA..T...T.F..FETA.R...Y.KVE..S..P.....I...W..          | 128 |
| 19ACT06_bE2-chr4A | 1   | .....L.S...RAKT.V.R.....I.S.L..RQRPV-L.....I.A.A..V...Q...VL.DR...AA..T...T.F..FETA.R...Y.KVE..S..P.....I...W..          | 128 |
| 19NSW04_bE3-chr4B | 128 | .....D.I..L.....P.....S.A.....Y..K.....M.....                                                                            | 255 |
| 19ACT06_bE3-chr4B | 128 | .....D.I..L.....P.....S.A.....Y..K.....M.....                                                                            | 255 |
| 20QLD87_bE3-chr4D | 127 | ..L...A...T...H.....SS...S.....Y..K.....A...M...V.....                                                                   | 255 |
| 20QLD87_bE4-chr4C | 129 | V.I.K...T...T...S.....S.....Y..D.E...L.....S.....                                                                        | 256 |
| 19NSW04_bE4-chr4C | 129 | V.I.K...T...T...S.....S.....Y..D.E...L.....S.....                                                                        | 256 |
| Race1_bE1         | 129 | AL...T...AFV...T...P.....S.....Y..D.E...L.....S.....                                                                     | 256 |
| Race1_bE2         | 129 | ..E..AH...E...T...P.....Y..H...A.....Y..D.E...L.....S.....                                                               | 256 |
| 19ACT06_bE2-chr4A | 129 | ..E..AH...E...T...P.....Y..H...A.....Y..D.E...L.....S.....                                                               | 256 |
| 19NSW04_bE3-chr4B | 256 | .....                                                                                                                    | 373 |
| 19ACT06_bE3-chr4B | 256 | .....                                                                                                                    | 373 |
| 20QLD87_bE3-chr4D | 256 | .....                                                                                                                    | 373 |
| 20QLD87_bE4-chr4C | 257 | .....                                                                                                                    | 374 |
| 19NSW04_bE4-chr4C | 257 | .....                                                                                                                    | 378 |
| Race1_bE1         | 257 | .....                                                                                                                    | 374 |
| Race1_bE2         | 257 | .....                                                                                                                    | 374 |
| 19ACT06_bE2-chr4A | 257 | .....D..I.....                                                                                                           | 374 |

Figure S8: Multiple sequence alignments of the bE and bW proteins.
